# Supplementary material for: Obstructive sleep apnea syndrome and causal relationship with female breast cancer: a mendelian randomization study
Source: Aging (Albany NY). 2020 Feb 29;12(5):4082–92. doi: 10.18632/aging.102725 (PMC7093176; doi:10.18632/aging.102725)
Supplement: Supplementary Table 1 [file aging-12-102725-s001..xlsx]

## Sheet: supplementary table 1
Supplementary table 1 GWAS loci for obstructive sleep apnea in GWAS catalog
PUBMEDID	FIRST AUTHOR	DATE	JOURNAL	REGION	CHR_ID	CHR_POS	REPORTED GENE(S)	MAPPED_GENE	STRONGEST SNP-RISK ALLELE	SNPS	SNP_ID_CURRENT	CONTEXT	INTERGENIC	RISK ALLELE FREQUENCY	P-VALUE	PVALUE_MLOG	P-VALUE (TEXT)	OR or BETA	95% CI (TEXT)	PLATFORM [SNPS PASSING QC]	CNV	MAPPED_TRAIT	STUDY ACCESSION
26977737	Cade BE	2016-03-15	Am J Respir Crit Care Med	1q31.2	1	191832003	intergenic	LINC01680 - AL359081.1	rs11588454-T	rs11588454	11588454	intergenic_variant	1	0.75	8e-08	7.09691	(Hispanic, males)	0.124	[0.079-0.169] unit decrease	Affymetrix, Illumina [NR] (imputed)	N	sleep apnea measurement, obstructive sleep apnea	GCST003674
26977737	Cade BE	2016-03-15	Am J Respir Crit Care Med	1q32.1	1	203747715	ATP2B4	ATP2B4 - LAX1	rs116133558-T	rs116133558	116133558	intergenic_variant	1	0.014	2e-07	6.69897	(Hispanic, BMI-adjusted)	0.291	[0.18-0.4] unit increase	Affymetrix, Illumina [NR] (imputed)	N	sleep apnea measurement, obstructive sleep apnea	GCST003673
26977737	Cade BE	2016-03-15	Am J Respir Crit Care Med	1q23.3	1	165016519	intergenic	RNU6-755P - LMX1A	rs140743827-A	rs140743827	140743827	intergenic_variant	1	0.018	2e-07	6.69897	(Hispanic, men)	0.428	[0.27-0.59] unit increase	Affymetrix, Illumina [NR] (imputed)	N	sleep apnea measurement, obstructive sleep apnea	GCST003674
26977737	Cade BE	2016-03-15	Am J Respir Crit Care Med	1q42.2	1	233818485	NR	AL357972.1 - AL663058.1	rs75108997-A	rs75108997	75108997	intergenic_variant	1	NR	7e-07	6.1549	(Hispanic, females)	0.365	[0.22-0.51] unit decrease	Affymetrix, Illumina [NR] (imputed)	N	sleep apnea measurement, obstructive sleep apnea	GCST003673
26977737	Cade BE	2016-03-15	Am J Respir Crit Care Med	2p24.1	2	21471579	AC011752.1, AC067959.1	AC018742.1, AC011752.1	rs11897825-A	rs11897825	11897825	intron_variant	0	0.606	5e-07	6.30103	(Hispanic, females)	0.09	[0.055-0.125] unit decrease	Affymetrix, Illumina [NR] (imputed)	N	sleep apnea measurement, obstructive sleep apnea	GCST003674
26977737	Cade BE	2016-03-15	Am J Respir Crit Care Med	2p24.3	2	15076492	intergenic	AC068286.1 - NBAS	rs2033354-T	rs2033354	2033354	intergenic_variant	1	0.784	4e-07	6.39794	(Hispanic)	0.022	[0.014-0.030] unit decrease	Affymetrix, Illumina [NR] (imputed)	N	sleep apnea measurement, obstructive sleep apnea	GCST003675
26977737	Cade BE	2016-03-15	Am J Respir Crit Care Med	2q14.2	2	118185307	AC093901.1	THORLNC	rs4849682-T	rs4849682	4849682	intron_variant	0	0.29	5e-07	6.30103	(Hispanic, males)	0.03	[0.018-0.042] unit decrease	Affymetrix, Illumina [NR] (imputed)	N	sleep apnea measurement, obstructive sleep apnea	GCST003675
26977737	Cade BE	2016-03-15	Am J Respir Crit Care Med	2p14	2	64822719	intergenic	RN7SL341P - RF00019	rs999944-A	rs999944	999944	intergenic_variant	1	0.112	2e-07	6.69897	(Hispanic)	0.104	[0.065-0.143] unit decrease	Affymetrix, Illumina [NR] (imputed)	N	sleep apnea measurement, obstructive sleep apnea	GCST003674
26977737	Cade BE	2016-03-15	Am J Respir Crit Care Med	5q31.3	5	143693985	CTB-57H20.1	AC008696.2	rs111942351-A	rs111942351	111942351	intron_variant	0	0.981	4e-07	6.39794	(Hispanic, males, BMI-adjusted)	0.363	[0.22-0.5] unit increase	Affymetrix, Illumina [NR] (imputed)	N	sleep apnea measurement, obstructive sleep apnea	GCST003674
26977737	Cade BE	2016-03-15	Am J Respir Crit Care Med	6q21	6	109322403	C6ORF183, CCDC162P	CCDC162P	rs35424364-A	rs35424364	35424364	intron_variant	0	0.129	2e-08	7.69897	(Hispanic)	0.032	[0.020-0.044] unit increase	Affymetrix, Illumina [NR] (imputed)	N	sleep apnea measurement, obstructive sleep apnea	GCST003675
25325441	Baik I	2015-07-01	Sleep	8p12	8	32488779	NRG1	NRG1	rs10097555-A	rs10097555	10097555	intron_variant	0		5e-06	5.30103	(additive model)	2.5	[1.67-3.7]	Affymetrix [319517] (imputed)	N	sleep apnea measurement, obstructive sleep apnea	GCST003012
26977737	Cade BE	2016-03-15	Am J Respir Crit Care Med	11q21	11	94347083	LINC01171, GPR83, MRE11A	IZUMO1R - GPR83	rs116791765-T	rs116791765	116791765	intergenic_variant	1	0.989	2e-08	7.69897	(Hispanic)	0.345	[0.23-0.46] unit decrease	Affymetrix, Illumina [NR] (imputed)	N	sleep apnea measurement, obstructive sleep apnea	GCST003674
26977737	Cade BE	2016-03-15	Am J Respir Crit Care Med	11q13.4	11	75263946	ARRB1, CTD-2562J17.7, CTD-2562J17.9	ARRB1	rs35329661-T	rs35329661	35329661	3_prime_UTR_variant	0	0.013	2e-07	6.69897	(Hispanic, females)	0.134	[0.083-0.185] unit increase	Affymetrix, Illumina [NR] (imputed)	N	sleep apnea measurement, obstructive sleep apnea	GCST003675
26977737	Cade BE	2016-03-15	Am J Respir Crit Care Med	11p11.2	11	44741205	RP11- 45A12.2, TSPAN18	TSPAN18	rs74472562-T	rs74472562	74472562	intron_variant	0	0.086	6e-08	7.22185	(Hispanic)	0.035	[0.023-0.047] unit decrease	Affymetrix, Illumina [NR] (imputed)	N	sleep apnea measurement, obstructive sleep apnea	GCST003675
25325441	Baik I	2015-07-01	Sleep	12q21.33	12	92014509	C12orf79	LINC01619	rs10777373-C	rs10777373	10777373	intron_variant	0		5e-06	5.30103	(dominant model)	2.38095	[1.64-3.45]	Affymetrix [319517] (imputed)	N	obstructive sleep apnea	GCST003012
26977737	Cade BE	2016-03-15	Am J Respir Crit Care Med	12q24.32	12	125711743	intergenic	TMEM132B - AC005252.2	rs11610782-A	rs11610782	11610782	intergenic_variant	1	0.024	4e-07	6.39794	(Hispanic, males)	0.108	[0.067-0.149] unit increase	Affymetrix, Illumina [NR] (imputed)	N	sleep apnea measurement, obstructive sleep apnea	GCST003675
26977737	Cade BE	2016-03-15	Am J Respir Crit Care Med	12p11.23	12	27501431	SMCO2	SMCO2	rs199803244-A	rs199803244	199803244	intron_variant	0	0.945	5e-07	6.30103	(Hispanic, females)	0.187	[0.11-0.26] unit increase	Affymetrix, Illumina [NR] (imputed)	N	sleep apnea measurement, obstructive sleep apnea	GCST003674
26977737	Cade BE	2016-03-15	Am J Respir Crit Care Med	15q26.1	15	93371222	RP11-266O8.1	AC091078.1	rs148024591-T	rs148024591	148024591	intron_variant	0	0.017	7e-08	7.1549	(Hispanic, males)	0.117	[0.074-0.16] unit increase	Affymetrix, Illumina [NR] (imputed)	N	sleep apnea measurement, obstructive sleep apnea	GCST003675
26977737	Cade BE	2016-03-15	Am J Respir Crit Care Med	15q12	15	25584050	AC124997.1	AC023449.1 - ATP10A	rs72699765-A	rs72699765	72699765	intergenic_variant	1	0.11	5e-07	6.30103	(Hispanic)	0.029	[0.017-0.041] unit increase	Affymetrix, Illumina [NR] (imputed)	N	sleep apnea measurement, obstructive sleep apnea	GCST003675
26977737	Cade BE	2016-03-15	Am J Respir Crit Care Med	16p12.1	16	26493690	intergenic	AC130464.1 - LINC02195	rs11074782-T	rs11074782	11074782	intergenic_variant	1	0.23	2e-06	5.69897	(Hispanic, males)	0.113	[0.066-0.16] unit decrease	Affymetrix, Illumina [NR] (imputed)	N	sleep apnea measurement, obstructive sleep apnea	GCST003673
26977737	Cade BE	2016-03-15	Am J Respir Crit Care Med	17q12	17	36824731	intergenic	AC243830.1 - LHX1-DT	rs47996285-A	rs4796285	4796285	regulatory_region_variant	1	0.581	7e-06	5.1549	(Hispanic, males)	0.092	[0.053-0.131] unit decrease	Affymetrix, Illumina [NR] (imputed)	N	sleep apnea measurement, obstructive sleep apnea	GCST003674
26977737	Cade BE	2016-03-15	Am J Respir Crit Care Med	20p12.3	20	8264646	PLCB1	PLCB1	rs2743173-T	rs2743173	2743173	intron_variant	0	0.567	2e-07	6.69897	(Hispanic)	0.019	[0.011-0.027] unit increase	Affymetrix, Illumina [NR] (imputed)	N	sleep apnea measurement, obstructive sleep apnea	GCST003675
26977737	Cade BE	2016-03-15	Am J Respir Crit Care Med	20q13.33	20	61868195	CDH4	CDH4, CDH4	rs78897171-A	rs78897171	78897171	intron_variant	0	0.023	1e-07	7	(Hispanic, females)	0.108	[0.069-0.147] unit increase	Affymetrix, Illumina [NR] (imputed)	N	sleep apnea measurement, obstructive sleep apnea	GCST003675
